# Supplementary figures and images for: MTOR suppresses autophagy-mediated production of IL25 in allergic airway inflammation
Source: HighWire-hosted journal article supplement (doi:10.1136/thoraxjnl-2019-213771), 2020-10-18

## Figure S1

A

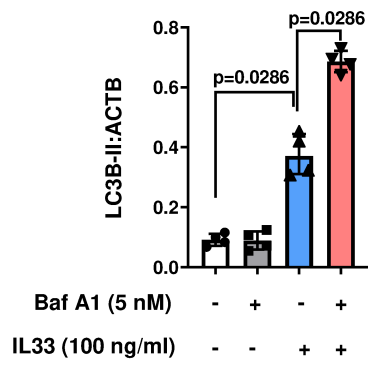

B

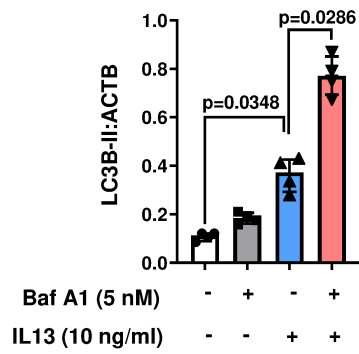

Supplement: thoraxjnl-2019-213771supp002_data_supplement.pdf [file thoraxjnl-2019-213771supp002_data_supplement.pdf]

**Figure S2**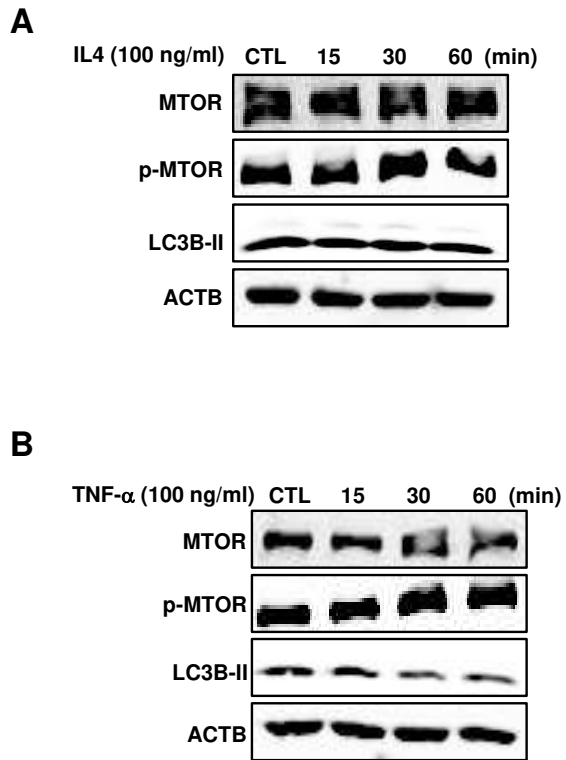

Supplement: thoraxjnl-2019-213771supp003_data_supplement.pdf [file thoraxjnl-2019-213771supp003_data_supplement.pdf]

Figure S3

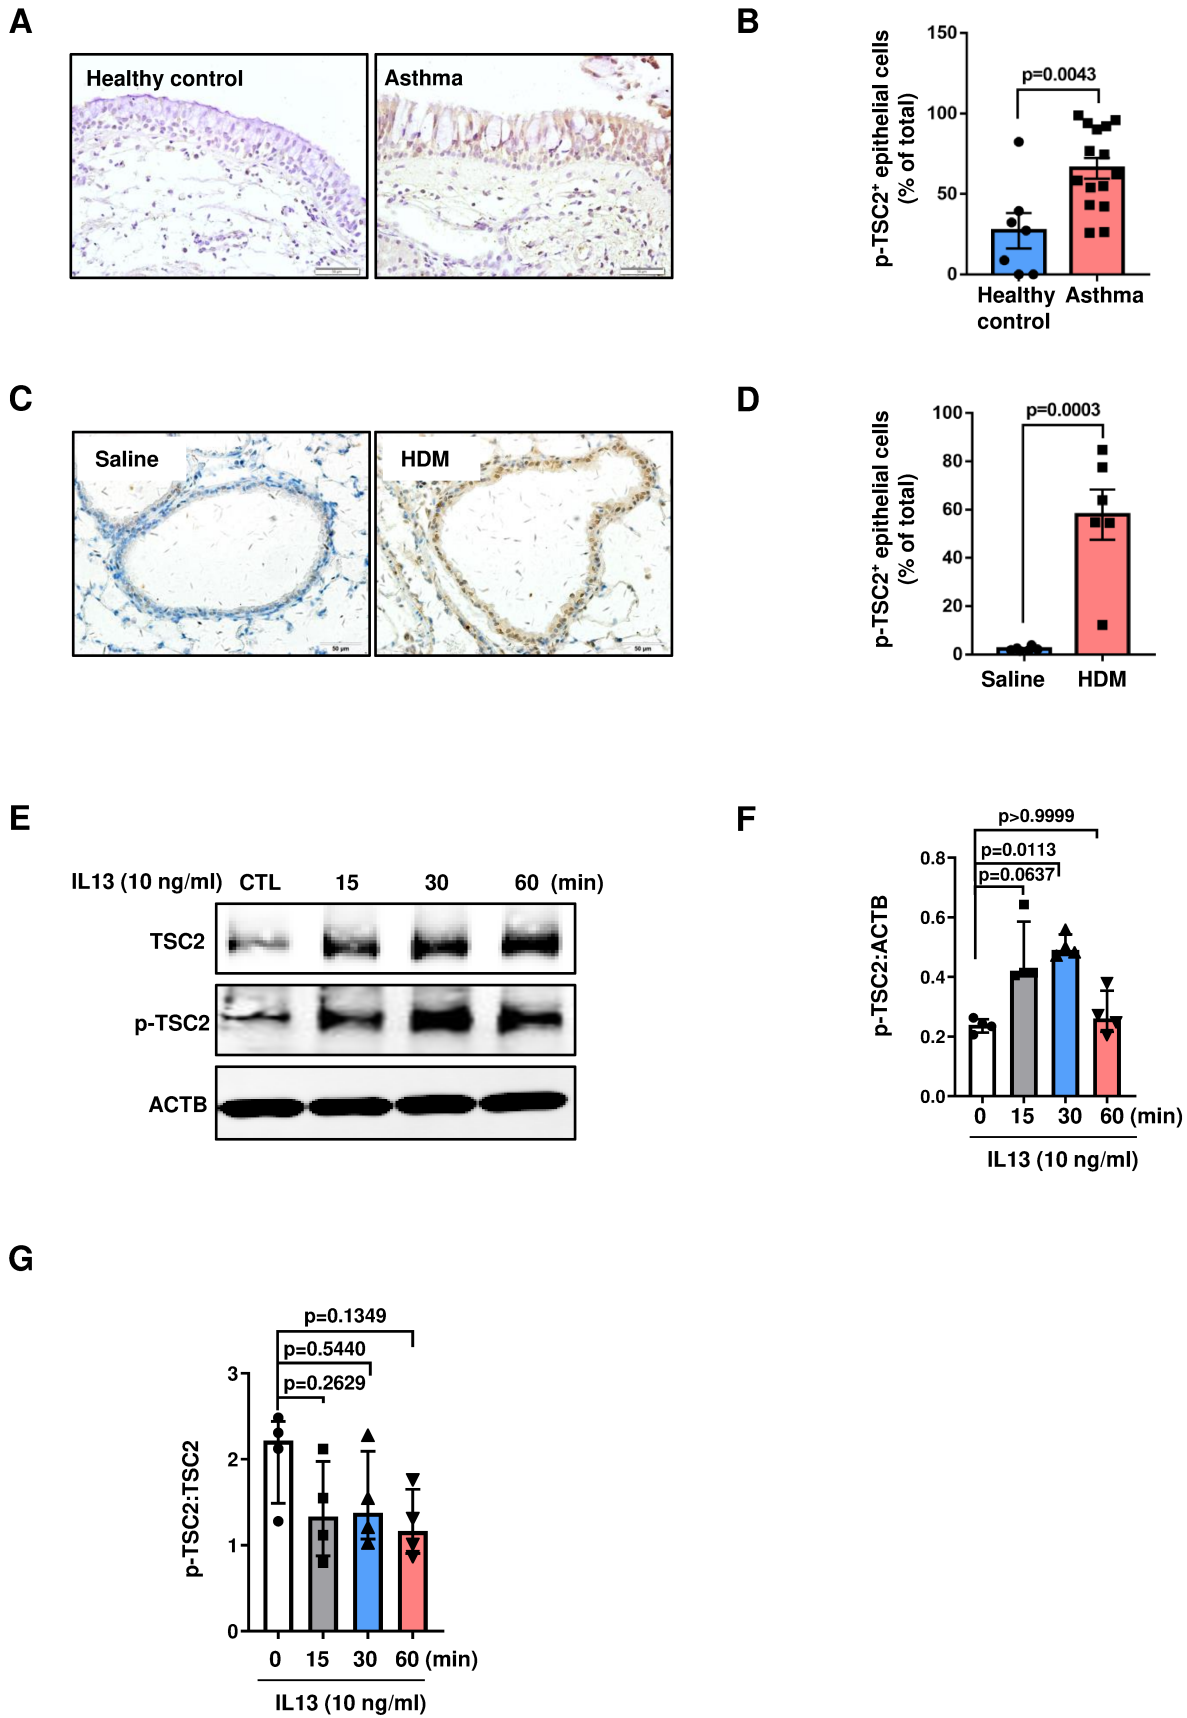

Supplement: thoraxjnl-2019-213771supp004_data_supplement.pdf [file thoraxjnl-2019-213771supp004_data_supplement.pdf]

Figure S4

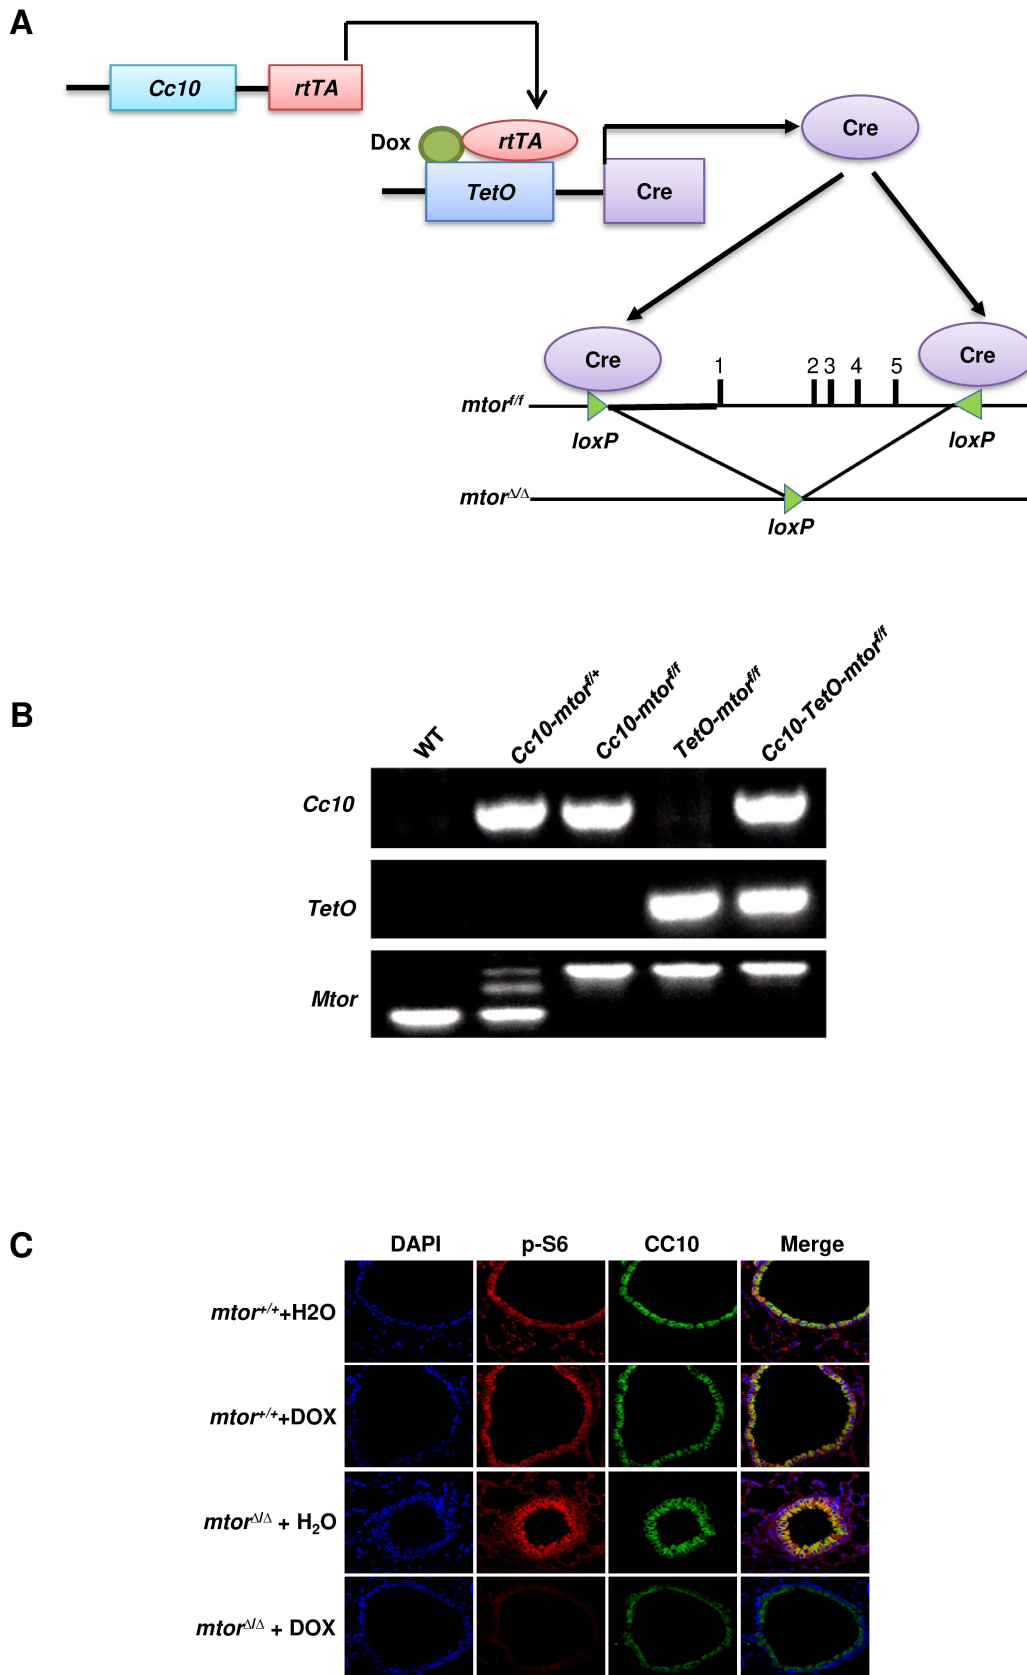

Supplement: thoraxjnl-2019-213771supp005_data_supplement.pdf [file thoraxjnl-2019-213771supp005_data_supplement.pdf]

Figure S5

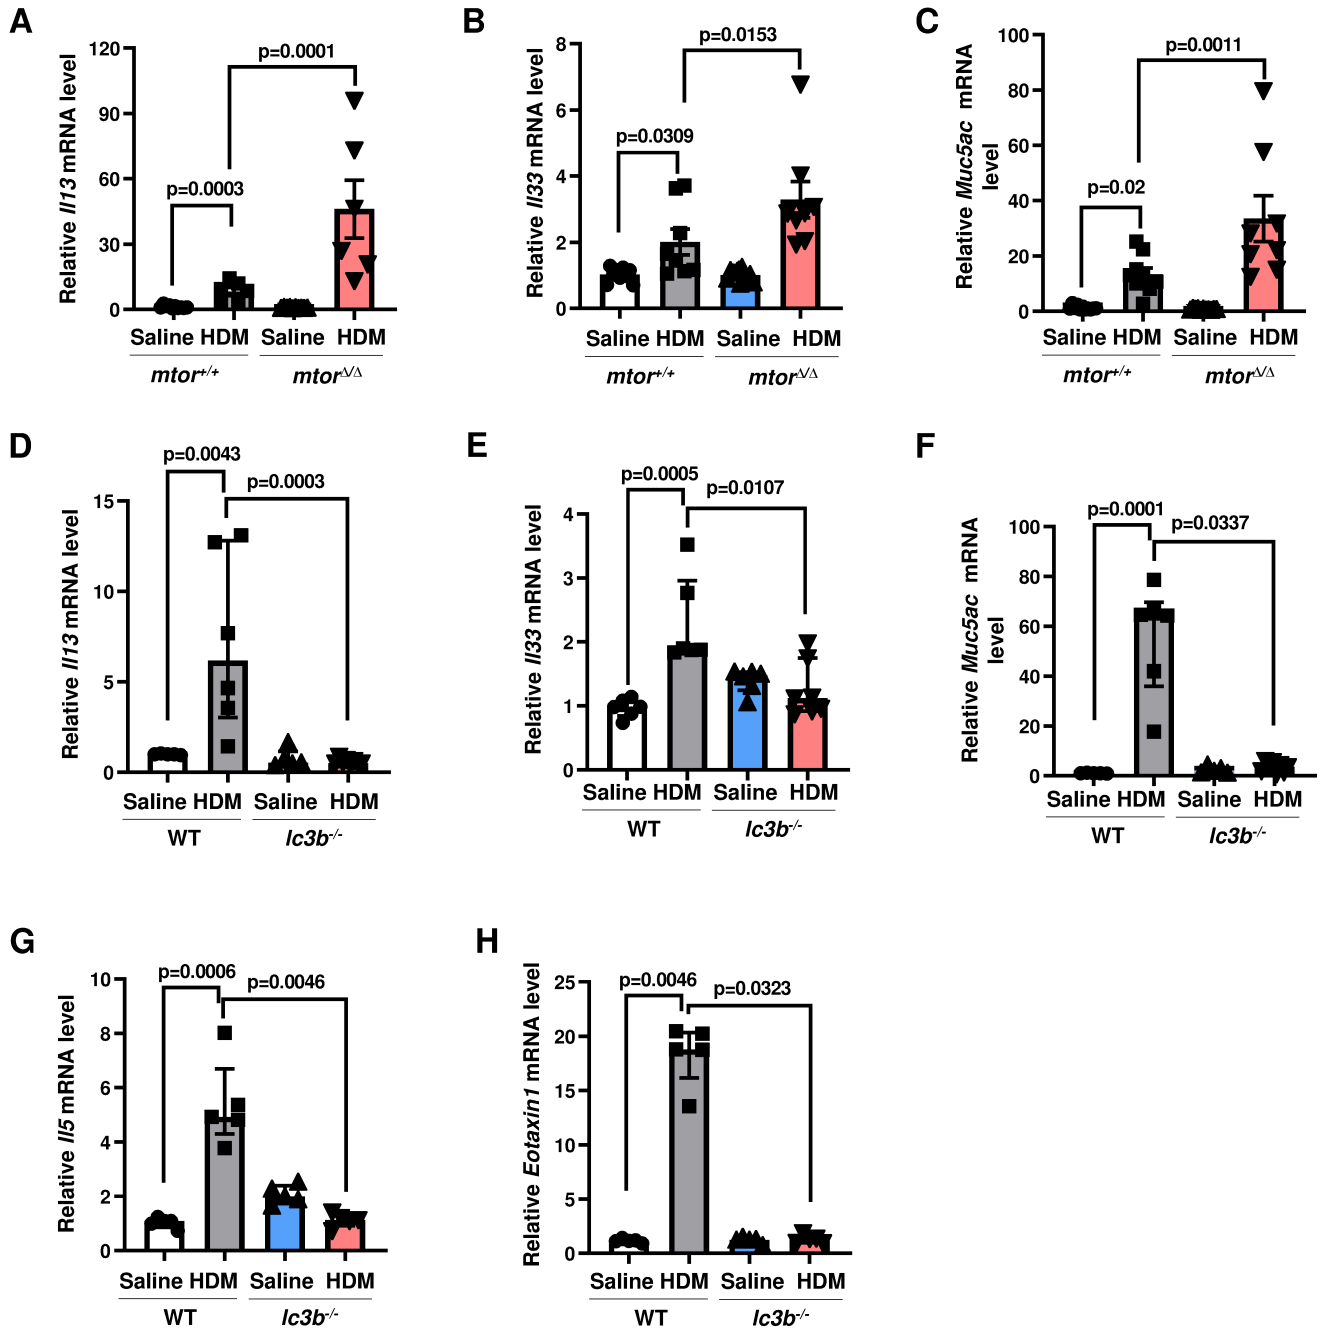

Supplement: thoraxjnl-2019-213771supp006_data_supplement.pdf [file thoraxjnl-2019-213771supp006_data_supplement.pdf]

Figure S6

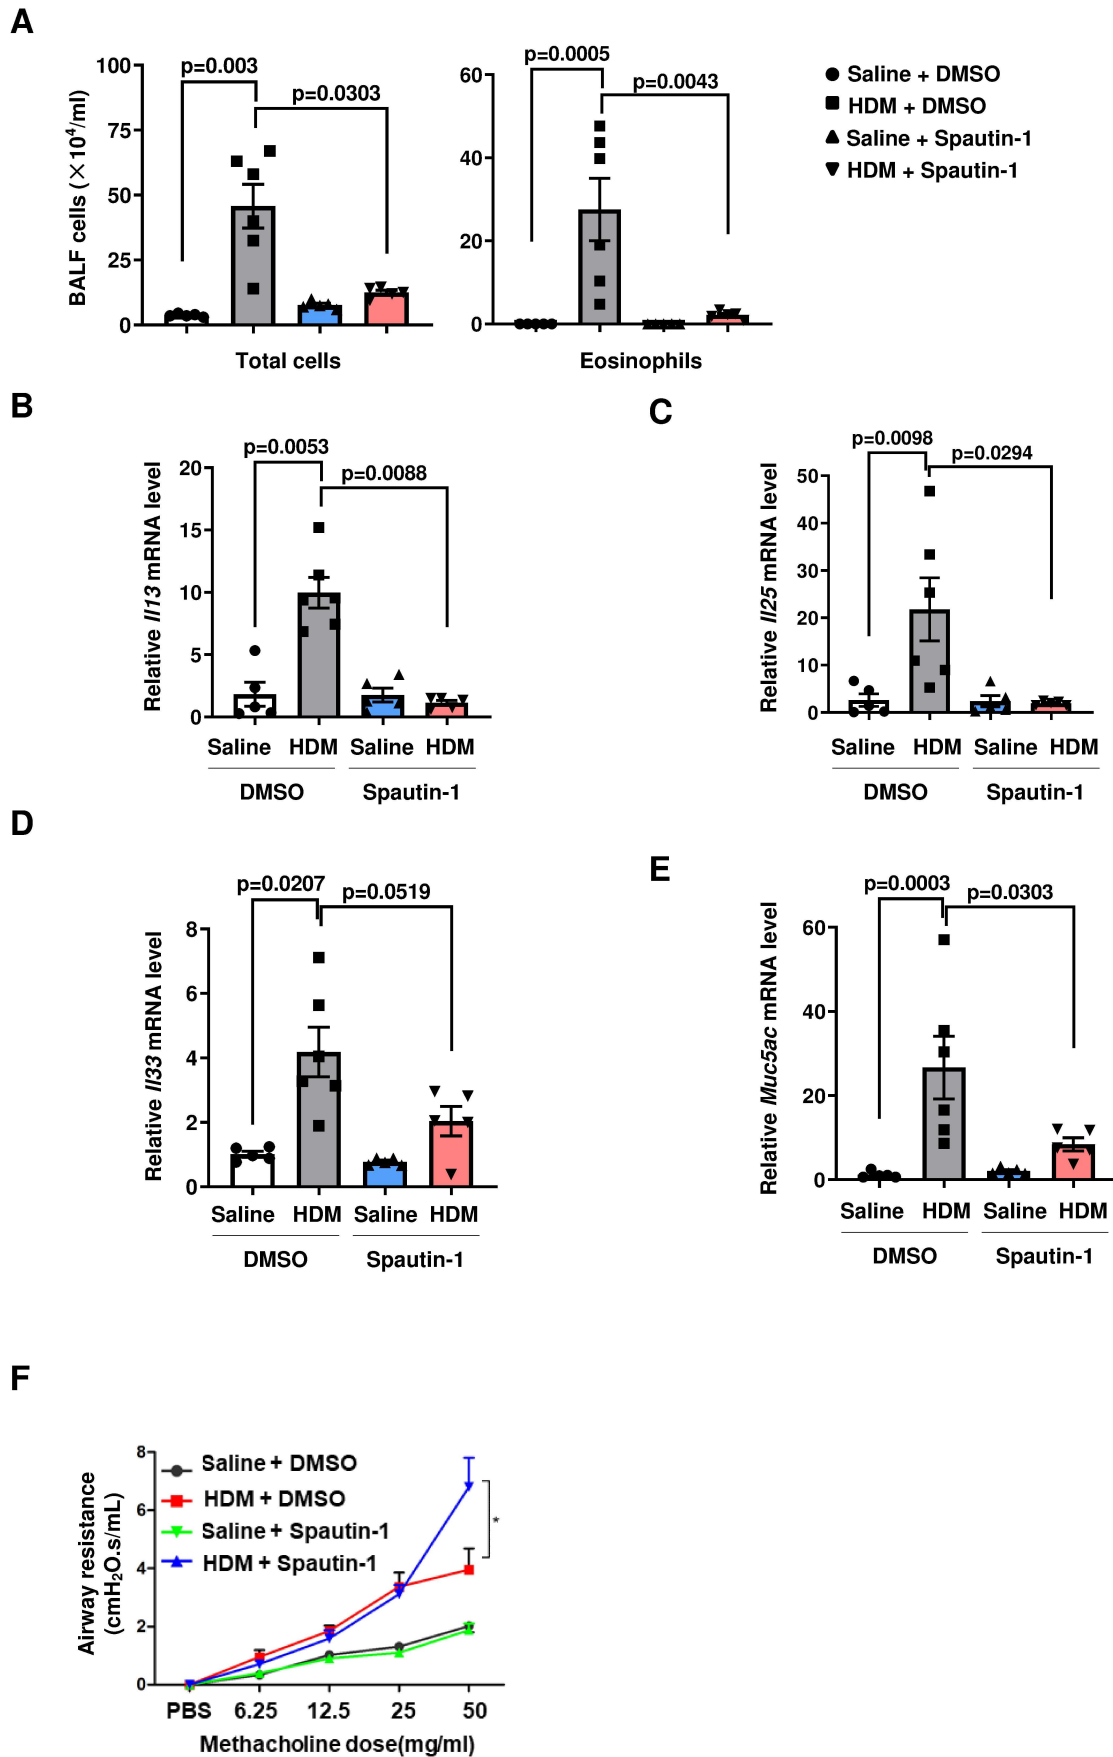

Supplement: thoraxjnl-2019-213771supp007_data_supplement.pdf [file thoraxjnl-2019-213771supp007_data_supplement.pdf]

Figure S7

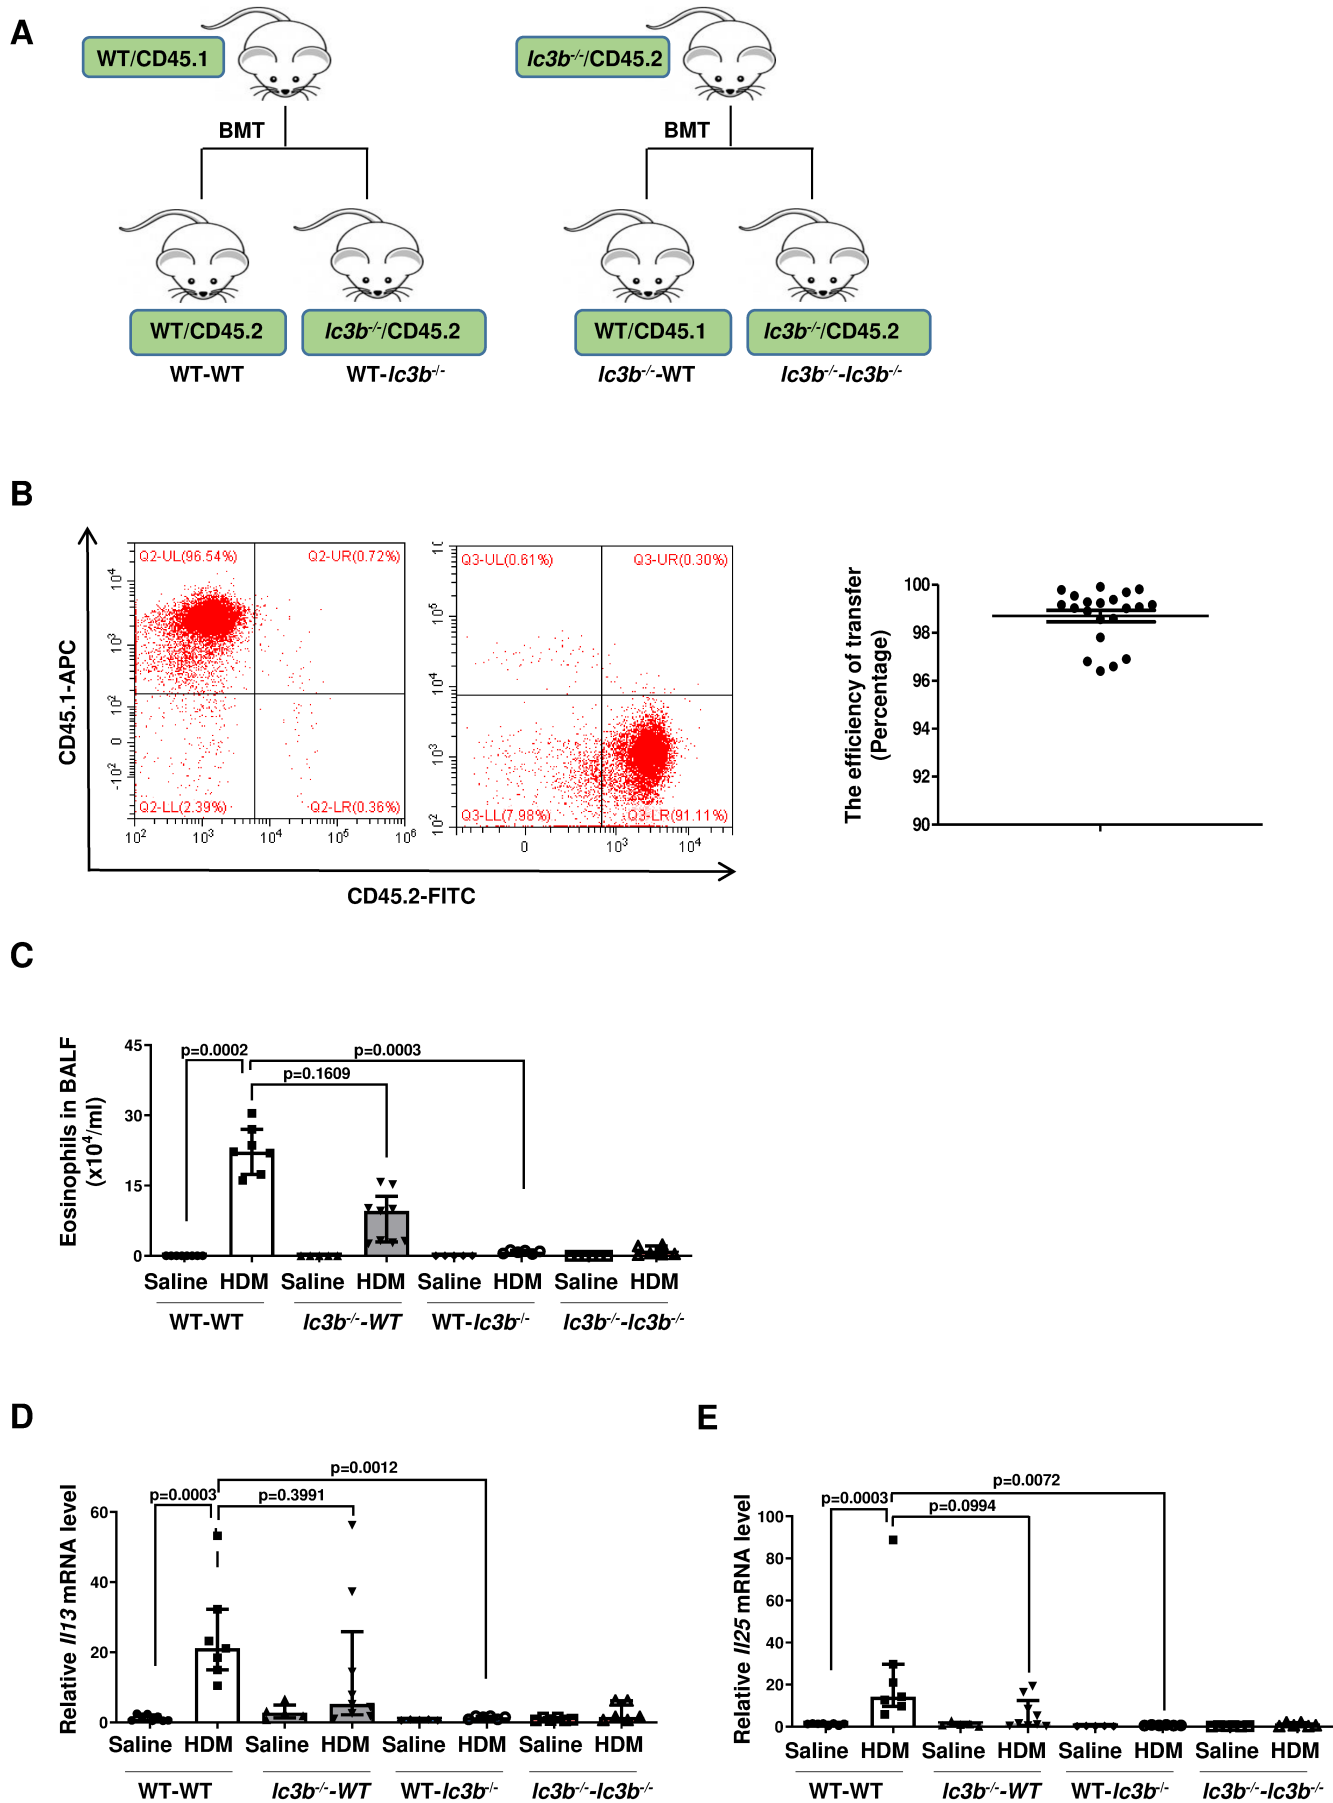

Supplement: thoraxjnl-2019-213771supp008_data_supplement.pdf [file thoraxjnl-2019-213771supp008_data_supplement.pdf]

## Figure S8

A

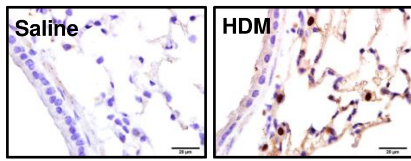

B

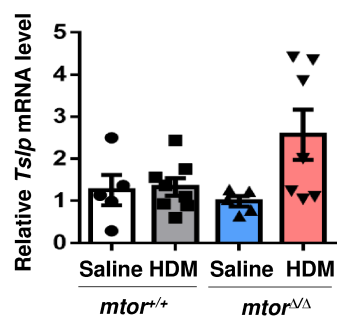

C

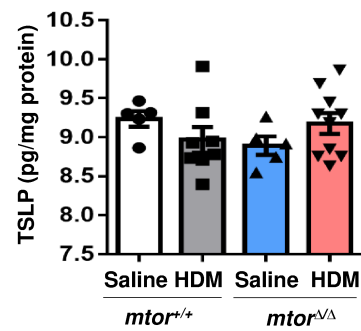

D

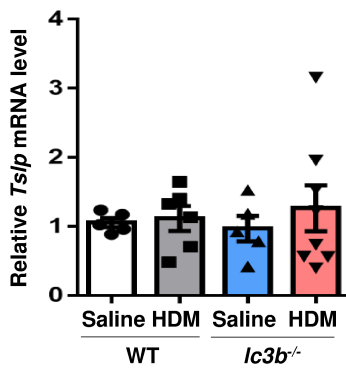

E

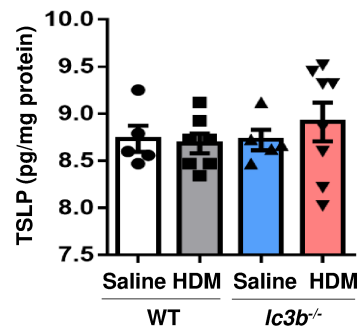

Supplement: thoraxjnl-2019-213771supp009_data_supplement.pdf [file thoraxjnl-2019-213771supp009_data_supplement.pdf]

Figure S9

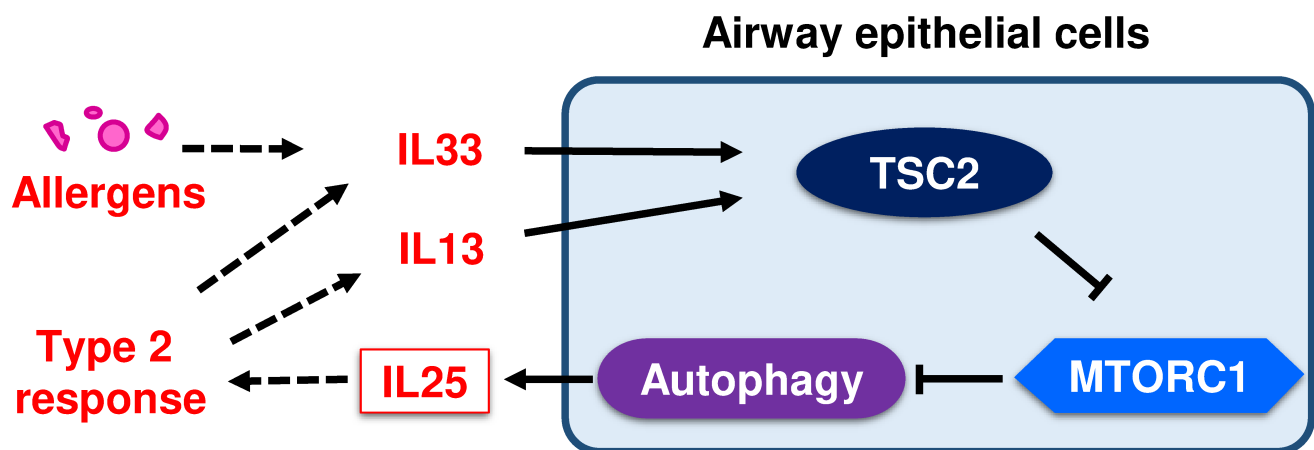

Supplement: thoraxjnl-2019-213771supp010_data_supplement.pdf [file thoraxjnl-2019-213771supp010_data_supplement.pdf]
